# Supplementary material for: Environmental DNA simultaneously informs hydrological and biodiversity characterization of an Alpine catchment
Source: Copernicus journal article supplement (doi:10.5194/hess-25-735-2021), 2021-02-18
Supplement: Supplementary file 1 [file hess-25-735-2021-supplement.zip]

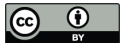

## *Supplement of*

# **Environmental DNA simultaneously informs hydrological and biodiversity characterization of an Alpine catchment**

**Elvira Mächler et al.**

*Correspondence to:* Elvira Mächler ([elvira.maechler@gmail.com](mailto:elvira.maechler@gmail.com)) and Natalie Ceperley ([natalie.ceperley@giub.unibe.ch](mailto:natalie.ceperley@giub.unibe.ch))

- [hess-25-735-2021-supplement-title-page.pdf](#)
- [HESS\\_Supp.pdf](#)
- [S5\\_Cummulative\\_relfreq\\_threshold.txt](#)
- [S6\\_Species\\_List.pdf](#)

The copyright of individual parts of the supplement might differ from the CC BY 4.0 License.
