# Supplementary material for: Environmental DNA simultaneously informs hydrological and biodiversity characterization of an Alpine catchment
Source: Copernicus journal article supplement (doi:10.5194/hess-25-735-2021), 2021-02-18
Supplement: Supplementary file 2 [file hess-25-735-2021-supplement.zip]

| Phylum     | Class      | Order          | Family         | Genus                  | Species                           |
|------------|------------|----------------|----------------|------------------------|-----------------------------------|
| Annelida   | Clitellata | Haplotaxida    | Enchytraeidae  | <i>Buchholzia</i>      | <i>Buchholzia appendiculata</i>   |
|            |            |                |                | <i>Buchholzia</i>      | NA                                |
|            |            |                |                | <i>Chamaedrillus</i>   | <i>Chamaedrillus chlorophilus</i> |
|            |            |                |                | <i>Fridericia</i>      | <i>Fridericia ratzeli</i>         |
|            |            |                |                | <i>Globulidrilus</i>   | <i>Globulidrilus riparius</i>     |
|            |            |                |                | <i>Henlea</i>          | <i>Henlea nasuta</i>              |
|            |            |                |                | <i>Henlea</i>          | <i>Henlea perpusilla</i>          |
|            |            |                | Lumbricidae    | <i>Aporrectodea</i>    | <i>Aporrectodea rosea</i>         |
|            |            |                |                | <i>Aporrectodea</i>    | NA                                |
|            |            |                |                | <i>Dendrodrilus</i>    | <i>Dendrodrilus rubidus</i>       |
|            |            |                |                | <i>Eiseniella</i>      | <i>Eiseniella tetraedra</i>       |
|            |            |                |                | <i>Lumbricus</i>       | <i>Lumbricus rubellus</i>         |
|            |            |                |                | <i>Lumbricus</i>       | <i>Lumbricus terrestris</i>       |
|            |            |                |                | <i>Octolasion</i>      | <i>Octolasion lacteum</i>         |
|            |            |                |                | <i>Octolasion</i>      | <i>Octolasion tyrtaeum</i>        |
|            |            |                | Tubificidae    | <i>Nais</i>            | <i>Nais communis</i>              |
| Arthropoda | Arachnida  | Araneae        | Thomisidae     | <i>Xysticus</i>        | <i>Xysticus gallicus</i>          |
|            |            | Opiliones      | Leiobunidae    | <i>Leiobunum</i>       | <i>Leiobunum limbatum</i>         |
|            |            |                |                | <i>Amilenus</i>        | <i>Amilenus aurantiacus</i>       |
|            |            |                |                | <i>Dicranopalpus</i>   | <i>Dicranopalpus gasteinensis</i> |
|            |            |                |                | <i>Lacinius</i>        | <i>Lacinius ephippiatus</i>       |
|            |            |                |                | <i>Mitopus</i>         | <i>Mitopus morio</i>              |
|            |            |                |                | <i>Phalangium</i>      | <i>Phalangium opilio</i>          |
|            |            | Sarcoptiformes | Camisiidae     | <i>Platynothrus</i>    | <i>Platynothrus peltifer</i>      |
|            |            |                | Steganacaridae | <i>Steganacarus</i>    | <i>Steganacarus applicatus</i>    |
|            |            | Trombidiformes | Phytoptidae    | <i>Phytoptus</i>       | <i>Phytoptus alchemillae</i>      |
|            | Chilopoda  | Geophilomorpha | Geophilidae    | <i>Brachygeophilus</i> | <i>Brachygeophilus truncorum</i>  |
|            |            |                | Geophilidae    | <i>Geophilus</i>       | <i>Geophilus alpinus</i>          |
|            |            | Lithobiomorpha | Lithobiidae    | <i>Eupolybothrus</i>   | <i>Eupolybothrus tridentinus</i>  |
|            |            |                |                | <i>Lithobius</i>       | <i>Lithobius forficatus</i>       |
|            |            |                |                | <i>Lithobius</i>       | <i>Lithobius pelidnus</i>         |
|            |            |                |                | <i>Lithobius</i>       | <i>Lithobius pygmaeus</i>         |

| Phylum     | Class      | Order            | Family          | Genus                 | Species                                |
|------------|------------|------------------|-----------------|-----------------------|----------------------------------------|
| Arthropoda | Chilopoda  | Lithobiomorpha   | Lithobiidae     | <i>Lithobius</i>      | <i>Lithobius tenebrosus</i>            |
|            | Collembola | Entomobryomorpha | Entomobryidae   | <i>Entomobrya</i>     | <i>Entomobrya marginata</i>            |
|            |            |                  |                 | <i>Entomobrya</i>     | <i>Entomobrya nivalis</i>              |
|            |            |                  | Isotomidae      | <i>Isotomurus</i>     | <i>Isotomurus graminis</i>             |
|            |            | Poduromorpha     | Hypogastruridae | <i>Ceratophysella</i> | NA                                     |
|            |            |                  | Neanuridae      | <i>Neanura</i>        | <i>Neanura muscorum</i>                |
|            | Diplopoda  | Glomerida        | Glomeridae      | <i>Glomeris</i>       | <i>Glomeris valesiaca</i>              |
|            |            | Julida           | Julidae         | <i>Tachypodoiulus</i> | <i>Tachypodoiulus niger</i>            |
|            | Insecta    | Archaeognatha    | Machilidae      | <i>Machilis</i>       | NA                                     |
|            |            | Coleoptera       | Byrrhidae       | <i>Byrrhus</i>        | <i>Byrrhus arietinus</i>               |
|            |            |                  |                 | <i>Ancistronycha</i>  | <i>Ancistronycha abdominalis</i>       |
|            |            |                  |                 | <i>Cantharis</i>      | <i>Cantharis tristis</i>               |
|            |            |                  |                 | <i>Malthodes</i>      | <i>Malthodes brevicollis</i>           |
|            |            |                  |                 | <i>Malthodes</i>      | <i>Malthodes fuscus</i>                |
|            |            |                  |                 | <i>Malthodes</i>      | <i>Malthodes maurus</i>                |
|            |            |                  |                 | <i>Malthodes</i>      | <i>Malthodes pumilus</i>               |
|            |            |                  |                 | <i>Podistra</i>       | <i>Podistra schoenherri</i>            |
|            |            |                  | Carabidae       | <i>Bembidion</i>      | <i>Bembidion incognitum</i>            |
|            |            |                  |                 | <i>Carabus</i>        | <i>Carabus auronitens</i>              |
|            |            |                  |                 | <i>Leiopus</i>        | <i>Leiopus nebulosus</i>               |
|            |            |                  | Chrysomelidae   | <i>Aphthona</i>       | <i>Aphthona venustula</i>              |
|            |            |                  |                 | <i>Cryptocephalus</i> | <i>Cryptocephalus quadripustulatus</i> |
|            |            |                  |                 | <i>Hydrothassa</i>    | <i>Hydrothassa glabra</i>              |
|            |            |                  |                 | <i>Longitarsus</i>    | <i>Longitarsus succineus</i>           |
|            |            |                  |                 | <i>Oreina</i>         | NA                                     |
|            |            |                  |                 | <i>Oreina</i>         | <i>Oreina bifrons</i>                  |
|            |            |                  |                 | <i>Oreina</i>         | <i>Oreina speciosa</i>                 |
|            |            |                  | Curculionidae   | <i>Otiorhynchus</i>   | <i>Otiorhynchus porcatus</i>           |
|            |            |                  |                 | <i>Phyllobius</i>     | NA                                     |
|            |            |                  |                 | <i>Pityogenes</i>     | <i>Pityogenes chalcographus</i>        |
|            |            |                  | Elateridae      | <i>Dalopius</i>       | <i>Dalopius marginatus</i>             |
|            |            |                  |                 | <i>Sericus</i>        | <i>Sericus brunneus</i>                |

| Phylum     | Class   | Order      | Family          | Genus                    | Species                            |
|------------|---------|------------|-----------------|--------------------------|------------------------------------|
| Arthropoda | Insecta | Coleoptera | Elateridae      | <i>Zorochros</i>         | NA                                 |
|            |         |            |                 | <i>Zorochros</i>         | <i>Zorochros dufouri</i>           |
|            |         |            | Helophoridae    | <i>Helophorus</i>        | <i>Helophorus glacialis</i>        |
|            |         |            | Hydrophilidae   | <i>Cercyon</i>           | <i>Cercyon impressus</i>           |
|            |         |            |                 | <i>Megasternum</i>       | <i>Megasternum obscurum</i>        |
|            |         |            |                 |                          |                                    |
|            |         |            | Lampyridae      | <i>Lampyris</i>          | <i>Lampyris noctiluca</i>          |
|            |         |            | Melyridae       | <i>Dasytes</i>           | <i>Dasytes cyaneus</i>             |
|            |         |            | Psephenidae     | <i>Eubria</i>            | <i>Eubria palustris</i>            |
|            |         |            | Scarabaeidae    | <i>Aphodius</i>          | <i>Aphodius rufipes</i>            |
|            |         |            | Silphidae       | <i>Phosphuga</i>         | <i>Phosphuga atrata</i>            |
|            |         |            | Staphylinidae   | <i>Aloconota</i>         | <i>Aloconota currax</i>            |
|            |         |            |                 | <i>Lathrobium</i>        | <i>Lathrobium fulvipenne</i>       |
|            |         |            |                 | <i>Lesteva</i>           | <i>Lesteva monticola</i>           |
|            |         |            |                 | <i>Ochtheophilus</i>     | <i>Ochtheophilus aureus</i>        |
|            |         |            |                 | <i>Platydracus</i>       | <i>Platydracus stercorarius</i>    |
|            |         |            |                 | <i>Quedius</i>           | <i>Quedius mesomelinus</i>         |
|            |         |            |                 |                          |                                    |
|            |         |            |                 | <i>Cteniopus</i>         | <i>Cteniopus sulphureus</i>        |
|            |         | Diptera    | Blephariceridae | <i>Liponeura</i>         | <i>Liponeura cordata</i>           |
|            |         |            | Calliphoridae   | <i>Pollenia</i>          | <i>Pollenia griseotomentosa</i>    |
|            |         |            |                 | <i>Pollenia</i>          | <i>Pollenia labialis</i>           |
|            |         |            | Ceratopogonidae | <i>Culicoides</i>        | <i>Culicoides chiopterus</i>       |
|            |         |            |                 | <i>Palpomyia</i>         | <i>Palpomyia armipes</i>           |
|            |         |            | Chironomidae    | <i>Bryophaenocladius</i> | <i>Bryophaenocladius ictericus</i> |
|            |         |            |                 | <i>Chaetocladius</i>     | <i>Chaetocladius perennis</i>      |
|            |         |            |                 | <i>Corynoneura</i>       | <i>Corynoneura lobata</i>          |
|            |         |            |                 | <i>Diamesa</i>           | <i>Diamesa bertrami</i>            |
|            |         |            |                 | <i>Diamesa</i>           | <i>Diamesa dampfi</i>              |
|            |         |            |                 | <i>Diamesa</i>           | <i>Diamesa goetghebueri</i>        |
|            |         |            |                 | <i>Diamesa</i>           | <i>Diamesa latitarsis</i>          |
|            |         |            |                 | <i>Diamesa</i>           | <i>Diamesa modesta</i>             |
|            |         |            |                 | <i>Diamesa</i>           | <i>Diamesa steinboeckii</i>        |
|            |         |            |                 | <i>Diamesa</i>           | <i>Diamesa tonsa</i>               |

| Phylum     | Class   | Order   | Family         | Genus                    | Species                          |
|------------|---------|---------|----------------|--------------------------|----------------------------------|
| Arthropoda | Insecta | Diptera | Chironomidae   | <i>Diamesa</i>           | <i>Diamesa zernyi</i>            |
|            |         |         |                | <i>Diamesa</i>           | NA                               |
|            |         |         |                | <i>Limnophyes</i>        | <i>Limnophyes pentaplastus</i>   |
|            |         |         |                | <i>Micropsectra</i>      | <i>Micropsectra notescens</i>    |
|            |         |         |                | <i>Micropsectra</i>      | <i>Micropsectra sofiae</i>       |
|            |         |         |                | <i>Orthocladius</i>      | <i>Orthocladius frigidus</i>     |
|            |         |         |                | <i>Paratrichocladius</i> | <i>Paratrichocladius osellai</i> |
|            |         |         |                | <i>Rheocricotopus</i>    | <i>Rheocricotopus atripes</i>    |
|            |         |         |                | <i>Tvetenia</i>          | <i>Tvetenia bavarica</i>         |
|            |         |         | Empididae      | <i>Rhamphomyia</i>       | <i>Rhamphomyia hybotina</i>      |
|            |         |         | Hybotidae      | <i>Platypalpus</i>       | NA                               |
|            |         |         | Limoniidae     | <i>Cheilotrichia</i>     | <i>Cheilotrichia cinerascens</i> |
|            |         |         |                | <i>Dicranomyia</i>       | <i>Dicranomyia didyma</i>        |
|            |         |         | Muscidae       | <i>Phaonia</i>           | <i>Phaonia subventa</i>          |
|            |         |         | Mycetophilidae | <i>Docosia</i>           | <i>Docosia montana</i>           |
|            |         |         |                | <i>Mycomya</i>           | <i>Mycomya shermani</i>          |
|            |         |         | Phoridae       | <i>Megaselia</i>         | <i>Megaselia brevicostalis</i>   |
|            |         |         | Pipunculidae   | <i>Eudorylas</i>         | <i>Eudorylas longifrons</i>      |
|            |         |         |                | <i>Verrallia</i>         | <i>Verrallia aucta</i>           |
|            |         |         | Rhagionidae    | <i>Rhagio</i>            | <i>Rhagio lineola</i>            |
|            |         |         | Sarcophagidae  | <i>Sarcophaga</i>        | <i>Sarcophaga okaliana</i>       |
|            |         |         |                | <i>Sarcophaga</i>        | <i>Sarcophaga rosellei</i>       |
|            |         |         | Scathophagidae | <i>Scathophaga</i>       | <i>Scathophaga suilla</i>        |
|            |         |         | Sciaridae      | <i>Phytosciara</i>       | <i>Phytosciara flavipes</i>      |
|            |         |         | Simuliidae     | <i>Prosimulium</i>       | NA                               |
|            |         |         |                | <i>Prosimulium</i>       | <i>Prosimulium hirtipes</i>      |
|            |         |         |                | <i>Prosimulium</i>       | <i>Prosimulium latimucro</i>     |
|            |         |         |                | <i>Simulium</i>          | NA                               |
|            |         |         |                | <i>Simulium</i>          | <i>Simulium murvanidzei</i>      |
|            |         |         |                | <i>Cheilosia</i>         | <i>Cheilosia melanura</i>        |
|            |         |         | Syrphidae      | <i>Chrysotoxum</i>       | NA                               |
|            |         |         |                | <i>Eupeodes</i>          | NA                               |

| Phylum     | Class   | Order         | Family           | Genus                 | Species                         |
|------------|---------|---------------|------------------|-----------------------|---------------------------------|
| Arthropoda | Insecta | Diptera       | Syrphidae        | <i>Melanostoma</i>    | NA                              |
|            |         |               |                  | <i>Volucella</i>      | <i>Volucella pellucens</i>      |
|            |         |               |                  | <i>Xanthandrus</i>    | <i>Xanthandrus comtus</i>       |
|            |         | Ephemeroptera | Tipulidae        | <i>Tipula</i>         | <i>Tipula truncorum</i>         |
|            |         |               | Baetidae         | <i>Baetis</i>         | <i>Baetis rhodani</i>           |
|            |         | Hemiptera     | Aphrophoridae    | <i>Philaenus</i>      | <i>Philaenus spumarius</i>      |
|            |         |               | Cicadellidae     | <i>Diplocolenus</i>   | NA                              |
|            |         |               |                  | <i>Eupteryx</i>       | <i>Eupteryx atropunctata</i>    |
|            |         |               |                  | <i>Euscelis</i>       | <i>Euscelis sordida</i>         |
|            |         |               |                  | <i>Forcipata</i>      | <i>Forcipata acclina</i>        |
|            |         |               |                  | <i>Forcipata</i>      | NA                              |
|            |         |               | Issidae          | <i>Issus</i>          | <i>Issus coleoptratus</i>       |
|            |         |               | Miridae          | <i>Atractotomus</i>   | <i>Atractotomus magnicornis</i> |
|            |         |               |                  | <i>Calocoris</i>      | <i>Calocoris affinis</i>        |
|            |         |               |                  | <i>Calocoris</i>      | <i>Calocoris alpestris</i>      |
|            |         |               |                  | <i>Chlamydatius</i>   | <i>Chlamydatius pulicarius</i>  |
|            |         |               |                  | <i>Lygus</i>          | NA                              |
|            |         |               |                  | <i>Phytocoris</i>     | NA                              |
|            |         |               |                  | <i>Phytocoris</i>     | <i>Phytocoris tiliae</i>        |
|            |         |               | Psyllidae        | <i>Cacopsylla</i>     | <i>Cacopsylla melanoneura</i>   |
|            |         |               | Rhyparochromidae | <i>Rhyparochromus</i> | <i>Rhyparochromus pini</i>      |
|            |         |               |                  | <i>Trapezonotus</i>   | NA                              |
|            |         |               | Tingidae         | <i>Acalypta</i>       | <i>Acalypta nigrina</i>         |
|            |         | Hymenoptera   | Formicidae       | <i>Lasius</i>         | <i>Lasius niger</i>             |
|            |         |               |                  | <i>Lasius</i>         | <i>Lasius psammophilus</i>      |
|            |         |               |                  | <i>Lasius</i>         | NA                              |
|            |         |               |                  | <i>Leptothorax</i>    | <i>Leptothorax canadensis</i>   |
|            |         |               |                  | <i>Myrmica</i>        | <i>Myrmica lobicornis</i>       |
|            |         |               |                  | <i>Myrmica</i>        | NA                              |
|            |         |               | Tenthredinidae   | <i>Euura</i>          | <i>Euura lichtwardti</i>        |
|            |         |               |                  | <i>Euura</i>          | <i>Euura scutellata</i>         |
|            |         |               |                  | <i>Phymatocera</i>    | <i>Phymatocera aterrima</i>     |

| Phylum     | Class       | Order         | Family           | Genus                 | Species                        |
|------------|-------------|---------------|------------------|-----------------------|--------------------------------|
| Arthropoda | Insecta     | Lepidoptera   | Crambidae        | <i>Anania</i>         | <i>Anania funebris</i>         |
|            |             |               |                  | <i>Scoparia</i>       | NA                             |
|            |             |               | Geometridae      | <i>Dysstroma</i>      | <i>Dysstroma citrata</i>       |
|            |             |               |                  | <i>Epirrhoe</i>       | <i>Epirrhoe molluginata</i>    |
|            |             |               |                  | <i>Epirrita</i>       | NA                             |
|            |             |               |                  | <i>Eupithecia</i>     | <i>Eupithecia tantillaria</i>  |
|            |             |               |                  | <i>Thera</i>          | <i>Thera vetustata</i>         |
|            |             |               |                  | <i>Phyllonorycter</i> | NA                             |
|            |             |               | Nepticulidae     | <i>Stigmella</i>      | <i>Stigmella dryadella</i>     |
|            |             |               | Noctuidae        | <i>Hada</i>           | <i>Hada plebeja</i>            |
|            |             |               | Tortricidae      | <i>Bactra</i>         | <i>Bactra lancealana</i>       |
|            |             |               |                  | <i>Dichrorampha</i>   | <i>Dichrorampha montanana</i>  |
|            |             |               |                  | <i>Epinotia</i>       | <i>Epinotia tedella</i>        |
|            |             |               |                  | <i>Lathronympha</i>   | <i>Lathronympha strigana</i>   |
|            |             |               |                  | <i>Syndemis</i>       | <i>Syndemis musculana</i>      |
|            |             | Neuroptera    | Hemerobiidae     | <i>Hemerobius</i>     | NA                             |
|            |             | Orthoptera    | Acrididae        | <i>Chorthippus</i>    | <i>Chorthippus parallelus</i>  |
|            |             |               |                  | <i>Omocestus</i>      | NA                             |
|            |             |               |                  | <i>Podisma</i>        | <i>Podisma pedestris</i>       |
|            |             | Plecoptera    | Leuctridae       | <i>Leuctra</i>        | <i>Leuctra alpina</i>          |
|            |             |               |                  | <i>Leuctra</i>        | <i>Leuctra rosinae</i>         |
|            |             |               | Taeniopterygidae | <i>Rhabdiopteryx</i>  | <i>Rhabdiopteryx neglecta</i>  |
|            |             |               | Caeciliusidae    | <i>Valenzuela</i>     | <i>Valenzuela burmeisteri</i>  |
|            |             |               |                  | <i>Valenzuela</i>     | <i>Valenzuela flavidus</i>     |
|            |             |               | Peripsocidae     | <i>Peripsocus</i>     | <i>Peripsocus subfasciatus</i> |
|            |             |               | Stenopsocidae    | <i>Graphopsocus</i>   | <i>Graphopsocus cruciatus</i>  |
|            |             | Trichoptera   | Limnephilidae    | <i>Drusus</i>         | <i>Drusus biguttatus</i>       |
|            |             |               |                  | <i>Halesus</i>        | <i>Halesus rubricollis</i>     |
| Chordata   | Maxillopoda | Cyclopoida    | Cyclopidae       | <i>Mesocyclops</i>    | NA                             |
|            | Actinopteri | Salmoniformes | Salmonidae       | <i>Salmo</i>          | NA                             |
|            | Amphibia    | Anura         | Ranidae          | <i>Rana</i>           | <i>Rana temporaria</i>         |
|            |             | Caudata       | Salamandridae    | <i>Salamandra</i>     | <i>Salamandra atra</i>         |

| Phylum   | Class       | Order           | Family             | Genus                 | Species                         |
|----------|-------------|-----------------|--------------------|-----------------------|---------------------------------|
| Chordata | Aves        | Galliformes     | Phasianidae        | <i>Lagopus</i>        | <i>Lagopus muta</i>             |
|          |             |                 | Cinclidae          | <i>Cinclus</i>        | <i>Cinclus cinclus</i>          |
|          |             |                 | Corvidae           | <i>Pyrrhocorax</i>    | <i>Pyrrhocorax graculus</i>     |
|          |             |                 | Fringillidae       | <i>Fringilla</i>      | <i>Fringilla coelebs</i>        |
|          |             |                 | Muscicapidae       | <i>Phoenicurus</i>    | <i>Phoenicurus ochruros</i>     |
|          |             |                 | Turdidae           | <i>Turdus</i>         | <i>Turdus philomelos</i>        |
|          | Mammalia    | Artiodactyla    | Bovidae            | <i>Rupicapra</i>      | <i>Rupicapra rupicapra</i>      |
|          |             |                 | Cervidae           | <i>Cervus</i>         | <i>Cervus elaphus</i>           |
|          |             |                 | Suidae             | <i>Sus</i>            | <i>Sus scrofa</i>               |
|          |             | Carnivora       | Mustelidae         | <i>Mustela</i>        | <i>Mustela nivalis</i>          |
|          |             | Rodentia        | Cricetidae         | <i>Chionomys</i>      | <i>Chionomys nivalis</i>        |
|          |             |                 |                    | <i>Myodes</i>         | <i>Myodes glareolus</i>         |
|          |             |                 | Muridae            | <i>Apodemus</i>       | <i>Apodemus flavicollis</i>     |
|          |             | Squamata        | Viperidae          | <i>Vipera</i>         | <i>Vipera berus</i>             |
|          | Reptilia    | Chaetonotida    | Chaetonotidae      | <i>Lepidodermella</i> | <i>Lepidodermella squamata</i>  |
| Mollusca | Gastropoda  | Pulmonata       | Physidae           | <i>Physella</i>       | <i>Physella acuta</i>           |
|          |             | Sorbeoconcha    | Hydrobiidae        | <i>Potamopyrgus</i>   | <i>Potamopyrgus antipodarum</i> |
|          |             | Stylommatophora | Arionidae          | <i>Arion</i>          | <i>Arion distinctus</i>         |
|          |             |                 |                    | <i>Arion</i>          | <i>Arion lusitanicus</i>        |
|          |             |                 | Chondrinidae       | <i>Abida</i>          | <i>Abida secale</i>             |
|          |             |                 | Cochlicopidae      | <i>Cochlicopa</i>     | <i>Cochlicopa lubrica</i>       |
|          |             |                 | Helicidae          | <i>Arianta</i>        | <i>Arianta arbustorum</i>       |
|          |             |                 |                    | <i>Macularia</i>      | <i>Macularia sylvatica</i>      |
|          |             |                 | Limacidae          | <i>Lehmannia</i>      | <i>Lehmannia marginata</i>      |
|          |             |                 | Vertiginidae       | <i>Vertigo</i>        | <i>Vertigo pusilla</i>          |
| Nematoda | Chromadorea | Rhabditida      | Trichostrongylidae | <i>Ostertagia</i>     | <i>Ostertagia ostertagi</i>     |
| Rotifera | Monogononta | Ploima          | Brachionidae       | <i>Keratella</i>      | <i>Keratella cochlearis</i>     |
|          |             |                 | Lecanidae          | <i>Lecane</i>         | <i>Lecane closteroerca</i>      |
|          |             |                 | Synchaetidae       | <i>Polyarthra</i>     | <i>Polyarthra vulgaris</i>      |
