# Supplementary material for: Environmental DNA simultaneously informs hydrological and biodiversity characterization of an Alpine catchment
Source: Copernicus journal article supplement (doi:10.5194/hess-25-735-2021), 2021-02-18
Supplement: Supplementary file 3 [file hess-25-735-2021-supplement.zip]

Archive with 4 entries (4 files):
- hess-25-735-2021-supplement-title-page.pdf
- S5_Cummulative_relfreq_threshold.txt
- S6_Species_List.pdf
- HESS_Supp.pdf
